# Supplementary material for: Epithelial-to-Mesenchymal Transition and MicroRNAs in Lung Cancer
Source: Cancers (Basel). 2017 Aug 3;9(8):101. doi: 10.3390/cancers9080101 (PMC5575604; doi:10.3390/cancers9080101)
Supplement: Supplementary file 1 [file cancers-09-00101-s001.xlsx]

## Sheet: Suppl Table 1
miR	Yanaihara et al. [121]	Volinia et al. [120]	Peltier et al. [122]	Zadran et al. [123]	Võsa et al. [124]	Cazzoli et al. [125]
miR-124a-1	down	up
miR-195		up	down
miR-224	down				up
miR-210	up	up		up	up
miR-143	down		down	down
miR-205	up	up			up
miR-106a	up	up
miR-126*	down	down
miR-144				down	down
miR-145	down	down
miR-149		up			up
miR-155	up	up
miR-191	up	up
miR-196a				up	up
miR-206				down	down
miR-214	up	up
miR-24-2	up	up
miR-30a-5p	down	down
miR-30d		down	down
miR-31				up	up
miR-32	down	down
miR-9	up				up
miR-9-1		up		up
let-7	down
let-7-a2-prec	down
let-7a			down
let-7a-2		up
let-7f-2				down
let-g		up
miR-1-2				down
miR-100						up
miR-101					down
miR-101-1	down
miR-101-2				down
miR-103			up
miR-105-1				up
miR-105-2				up
miR-106b*					up
miR-10a		up
miR-124a-3	down
miR-125a	down
miR-125a-prec	down
miR-126	down
miR-1269				up
miR-127		up
miR-1273					down
miR-1277				up
miR-1285					down
miR-128b		up
miR-129-1/2prec		up
miR-1294				down
miR-1304				down
miR-130a					down
miR-130b*					up
miR-132		up
miR-133a-2				down
miR-133b				down
miR-135a-2				down
miR-136		up
miR-139-5p						up
miR-140	down
miR-140-3p					down
miR-141		up
miR-142-as		up
miR-144*					down
miR-146	up
miR-147b				up
miR-148		up
miR-150	up
miR-151					up
miR-151-5p						up
miR-153-2				up
miR-154-3p						up
miR-16			down
miR-16-1		up
miR-16-2		up
miR-17-3p	up
miR-17-5p		up
miR-181c-prec	down
miR-182					up
miR-183					up
miR-184				down
miR-192	up
miR-192-prec	down
miR-193b					up
miR-196-1		up
miR-196-1-prec		up
miR-196-2		up
miR-196b					up
miR-197	up
miR-198	down
miR-199a-1		up
miR-199a-2		up
miR-199b-prec	down
miR-200a*					up
miR-200b		up
miR-200b-5p						up
miR-202		up
miR-203	up
miR-20a		up
miR-21		up
miR-212	up
miR-214a-1		up
miR-215		up
miR-216-prec	down
miR-218-2	down
miR-218b		up
miR-219-1	down
miR-220	down
miR-221			up
miR-24			up
miR-24-1		up
miR-24-2*					down
miR-26a-1 prec	down
miR-27b	down
miR-29b-2	down
miR-301a				up
miR-301b				up
miR-30a					down
miR-30a-3p						up
miR-30b		down
miR-30c		down
miR-3136				up
miR-3154				down
miR-3170				up
miR-3193				down
miR-323b				up
miR-33	down
miR-338-3p					down
miR-339-5p					up
miR-33b				up
miR-34a		up
miR-34a-prec		up
miR-3607				up
miR-378a						up
miR-378b				down
miR-379						up
miR-423-3p					up
miR-486				down
miR-486-5p					down
miR-490				down
miR-516a-1				down
miR-516a-2				down
miR-577				up
miR-607				down
miR-616				up
miR-629						up
miR-7-2		up
miR-708					up
miR-9-2				up
miR-93			up
miR-95	down
miR-99b		up
